# Supplementary material for: Seminal Plasma Anti-Müllerian Hormone: A Potential AI-Boar Fertility Biomarker?
Source: PubMed Central journal article supplement (PMC7236007; doi:10.3390/biology9040078), 2020-04-10
Supplement: biology-09-00078-s001.pdf [file biology-09-00078-s001.pdf]

| <b>SP-AMH group</b> | <b>Evaluation time-points</b> | <b>Viable sperm with intact acrosome membrane (%)</b> | <b>Viable sperm with non-intact acrosome membrane (%)</b> | <b>Non-viable sperm with intact acrosome membrane (%)</b> | <b>Non-viable sperm with non-intact acrosome membrane (%)</b> |
|---------------------|-------------------------------|-------------------------------------------------------|-----------------------------------------------------------|-----------------------------------------------------------|---------------------------------------------------------------|
| Low                 | 0                             | 84.48 ± 3.09                                          | 1.5 ± 0.16                                                | 2.87 ± 1.24                                               | 11.11 ± 2.09                                                  |
| High                | 0                             | 85.58 ± 1.37                                          | 1.6 ± 0.25                                                | 2.89 ± 0.58                                               | 9.92 ± 1.03                                                   |
| Low                 | 72                            | 85.78 ± 3.07                                          | 2.32 ± 0.52                                               | 2.22 ± 0.78                                               | 9.67 ± 1.92                                                   |
| High                | 72                            | 86.76 ± 1.09                                          | 2.54 ± 0.37                                               | 1.96 ± 0.41                                               | 8.73 ± 0.87                                                   |
